# Supplementary material for: Site-selective and stepwise complexation of two M(cod)+ (M = Rh, Ir) fragments with calix[4]areneElectronic supplementary information (ESI) available: experimental section. Fig. S1: structure of one of the independent molecules of 4. See http://www.rsc.org/suppdata/cc/b2/b201992m/
Source: Royal Society of Chemistry journal article supplement (doi:10.1039/b201992m), 2002-04-25
Supplement: b201992m.doc [file b201992m.doc]

**Supplementary information** for "Site-selective and stepwise complexation of two M(cod)+ (M = Rh, Ir) fragments with calix[4]arene" byYouichi Ishii, Ken-ichi Onaka, Hidehiko Hirakawa and Kohei Shiramizu

**General considerations**. All manipulations were carried out under an atmosphere of nitrogen by the use of standard Schlenk tube techniques. Solvents were dried by refluxing over Na/benzophenone ketyl (hexane) or P2O5 (dichloromethane) and distilled before use. 1H NMR (270 MHz) spectra were obtained on a JEOL EX-270 or LA-400 spectrometer. Elemental analyses were performed on a Perkin Elmer 2400II CHN analyser (for C, H and N).

**[(cod)Rh(6-L1H3)]·2CH2Cl2 (1a·2CH2Cl2).** [(cod)Rh(-OMe)]2 (484 mg, 1.00 mmol) and calix[4]arene (L1H4; 850 mg, 2.00 mmol) were dissolved in dichloromethane (50 cm3) and stirred for 6 d at room temperature. The resulting mixture was filtered and dried up in vacuo, and the residual yellow solid was dissolved in a minimum amount of dichloromethane. Addition of hexane to the solution gave **1a**·2CH2Cl2 as pale yellow crystals, which were collected by filtration, washed with hexane, and dried in vacuo. Yield, 1252 mg (1.56 mmol, 78%). H(CDCl3) 2.11, 2.34, 4.11 (br, 4H each, CH2 of cod), 3.18, 4.27 (d, 2H each, *J* = 12.7 Hz, CH2 of calixarene), 3.33, 4.65 (d, 2H each, *J* = 13.2 Hz, CH2 of calixarene), 5.01 (t, 1H, *J* = 6.0 Hz, *p*-H of 6-arene), 6.34 (d, 2H, *J* = 6.0 Hz, *m*-H of 6-arene), 6.59 (t, 1H, *J* = 7.4 Hz, *p*-H of arene), 6.66 (t, 2H, *J* = 7.4 Hz, *p*-H of arene), 6.90, 6.96, 7.13 (d, 2H each, *J* = 7.4 Hz, *m*-H of arene), 10.71 (br, 3H, OH). Found: C, 56.79; H, 4.94. C38H39Cl4O4Rh requires C, 56.74; H, 4.89.

**[(cod)Rh(6-L2H3)] (1b).** This complex was synthesized from [(cod)Rh(-OMe)]2 (1.01 mmol) and *p*-*tert*-butylcalix[4]arene (L2H4; 1.75 mmol) in 73% yield as a yellow powder by a similar procedure to that described for **1a**. H(CDCl3) 1.10 (s, 36H, *t*Bu), 1.98, 2.24, 3.97 (br, 4H each, cod), 2.91, 3.20, 4.16, 4.52 (d, 2H each, *J* = 13.2 Hz, CH2 of calixarene), 6.14 (s, 2H, *m*-H of 6-arene), 6.77, 6.91, 7.01 (s, 2H each, *m*-H of arene), 11.15 (br, 3H, OH). Found: C, 73.10; H, 7.83. C52H67O4Rh requires C, 72.71; H, 7.86.

**[(cod)Ir(6-L1H3)]·2CH2Cl2 (2·2CH2Cl2).** [(cod)Ir(-OMe)]2 (301 mg, 0.453 mmol) and L1H4 (385 mg, 0.906 mmol) were dissolved in dichloromethane (15 cm3) and stirred for 14 h in an oil bath at 50 ˚C. The white precipitate formed was collected by filtration, washed with hexane, and dried in vacuo. Yield, 405 mg (0.453 mmol, 50%). H(CDCl3) 2.05, 2.22, 4.06 (br, 4H each, cod), 2.86, 3.34, 4.12, 4.66 (d, 2H each, *J* = 13.2 Hz, CH2 of calixarene), 5.56 (br, 1H, *p*-H of 6-arene), 6.01 (d, 2H, *J* = 5.4 Hz, *m*-H of 6-arene), 6.59, (t, 1H, *J* = 7.6 Hz, *p*-H of arene), 6.66 (t, 2H, *J* = 7.6 Hz, *p*-H of arene), 6.85, 6.96, 7.13 (d, 2H each, *J* = 7.6 Hz, *m*-H of arene), 10.43 (br, 3H, OH). Found: C, 50.95; H, 4.73. C38H39Cl4O4Ir requires C, 51.07; H, 4.40.

**[{(cod)Rh}2(6:2-L1H2)]·CH2Cl2 (3a·CH2Cl2).** [(cod)Rh(-OMe)]2 (165 mg, 0.340 mmol) and L1H4 (127 mg, 0.300 mmol) were dissolved in dichloromethane (10 cm3) and stirred for 33 h in an oil bath at 50 ˚C. The resulting solution was dried up in vacuo, and the residual solid was dissolved in a minimum amount of dichloromethane. Addition of hexane to the filtered dichloromethane solution gave **3a**·CH2Cl2 as a cream yellow crystalline solid, which was collected by filtration, washed with hexane, and dried in vacuo. Yield, 199 mg (0.214 mmol, 71%). H(CDCl3, 20 ˚C) 1.74, 2.07, 2.33, 2.56 (br, 4H each, CH2 of cod), 3.20, 4.28 (br, 2H each, CH2 of calixarene), 3.35 (d, 2H, *J* = 13.2 Hz, CH2 of calixarene), 3.68–4.14 (m, 8H, CH= of cod), 4.57 (t, 1H, *J* = 5.7 Hz, *p*-H of 6-arene), 6.20 (d, 2H, *J* = 5.7 Hz, *m*-H of 6-arene), 6.52 (t, 2H, *J* = 7.3 Hz, *p*-H of arene), 6.56 (t, 1H, *J* = 7.3 Hz, *p*-H of arene), 6.95, 7.00, 7.02 (d, 2H each, *J* = 7.9 Hz, *m*-H of arene). The other protons in the calixarene ligand could not be assigned. H(CDCl3, –70 ˚C) 1.59, 1.99, 2.11 (br, 2H each, CH2 of cod), 1.75, 1.89, 2.59, 2.83 (br, 1H each, CH2 of cod), 2.20–2.45 (m, 6H, CH2 of cod), 3.52, 3.61, 4.06, 4.27 (br, 1H each, CH= of cod), 3.83, 3.96 (br, 2H each, CH= of cod), 3.02, 4.81 (AB, 1H each, *J* = 11.7 Hz, CH2 of calixarene), 3.32, 3.98 (AB, 1H each, *J* = 12.7 Hz, CH2 of calixarene), 3.43, 4.48 (AB, 1H each, *J* = 12.9 Hz, CH2 of calixarene), 3.53, 7.10 (AB, 1H each, *J* = 12.2 Hz, CH2 of calixarene), 4.58 (t, 1H, *J* = 5.7 Hz, *p*-H of 6-arene), 6.23, 6.31 (d, 1H each, 5.7 Hz, *m*-H of 6-arene), 6.47, 6.58, 6.64 (t, 1H each, *J* = 7.3 Hz, *p*-H of arene), 6.92, 7.12 (d, 1H each, *J* = 7.3 Hz, *m*-H of arene), 7.00–7.04 (m, 4H, *m*-H of arene), 10.66, 14.45 (s, 1H, OH). Found: C, 57.88; H, 5.42. C45H48Cl2O4Rh2 requires C, 58.14; H, 5.20.

**[{(cod)Rh}2(6:2-L2H2)]·0.5CH2Cl2 (3b·0.5CH2Cl2).** This complex was synthesized from [(cod)Rh(-OMe)]2 (0.400 mmol) and *p*-*tert*-butylcalix[4]arene (L2H4; 0.263 mmol) in 55% yield as yellow crystals by a similar procedure to that described for **3a**. H(CDCl3, 20 ˚C) 0.89 (s, 9H, *t*Bu), 1.10 (s, 18H, *t*Bu), 1.13 (s, 9H, *t*Bu), 1.72, 1.86, 2.14, 2.29 (br, 4H each, cod), 3.21 (d, 2H, *J* = 12.7 Hz, CH2 of calixarene), 5.99 (br, 2H, *m*-H of 6-arene), 6.82, 6.86, 6.91 (s, 2H each, *m*-H of arene). The other protons in the calixarene ligand could not be assigned. Found: C, 65.59; H, 7.31. C60.5H79ClO4Rh2 requires C, 65.37; H, 7.16.

**[{(cod)Rh}{(cod)Ir}(6:2-L1H2)] (4).** Complex **2**·2CH2Cl2 (108.6 mg, 0.122 mmol) and [(cod)Rh(-OMe)]2 (41.0 mg, 0.085 mmol) were dissolved in dichloromethane (10 cm3) and stirred for 46 h in an oil bath at 50 ˚C. The resulting yellow solution was dried up in vacuo, and the residual solid was dissolved in a minimum amount of dichloromethane. Addition of hexane to the dichloromethane solution gave **4** as orange-yellow crystals, which were collected by filtration, washed with hexane, and dried in vacuo. Yield, 105.9 mg (0.113 mmol, 93%). H(CDCl3, –60 ˚C) 1.72 (br, 3H, CH2 of cod), 1.85–2.03 (m, 5H, CH2 of cod), 2.20 (br, 4H, CH2 of cod), 2.39 (br, 2H, CH2 of cod), 2.69, 2.79 (br, 1H each, CH2 of cod), 3.61, 4.18, 4.27 (br, 1H each, CH= of cod), 3.82 (br, 3H, CH= of cod), 3.96 (br, 2H, CH= of cod), 2.50, 4.29 (AB, 1H each, *J* = 12.2 Hz, CH2 of calixarene), 3.27, 7.50 (AB, 1H each, *J* = 13.2 Hz, CH2 of calixarene), 3.30, 4.11 (AB, 1H each, *J* = 12.7 Hz, CH2 of calixarene), 3.37, 4.64 (AB, 1H each, *J* = 12.7 Hz, CH2 of calixarene), 5.41 (t, 1H, *J* = 5.4 Hz, *p*-H of 6-arene), 5.66, 6.11 (d, 1H each, *J* = 5.4 Hz, *m*-H of 6-arene), 6.41, 6.57 (t, 1H each, *J* = 7.6 Hz, *p*-H of arene), 6.63 (t, 1H, *J* = 7.3 Hz, *p*-H of arene), 6.87–6.91 (m, 2H, *m*-H of arene), 6.98–7.03 (m, 3H, *m*-H of arene), 7.07 (d, 1H, *J* = 7.3 Hz, *m*-H of arene), 10.08, 13.42 (s, 1H, OH). Found: C, 56.36; H, 5.12. C44H46IrO4Rh requires C, 56.58; H, 4.96.

**Crystallography.** Single crystals of **1a**·2CH2Cl2, **3a**·CH2Cl2 and **4** were sealed in glass capillaries under an argon atmosphere and used for data collection. Diffraction data were collected on a Rigaku AFC7R four-circle automated diffractometer with graphite-monochromatized Mo K radiation ( = 0.71069 Å) at room temperature using the –2** scan technique at a rate of 32˚ min–1 to a maximum 2** value of 55˚. The orientation matrixes and unit cell parameters were determined by least-squares refinement of 25 machine-centred reflections with 39.5 < 2** < 39.9˚ for **1a**·2CH2Cl2, 39.8 < 2** < 39.9˚ for **3a**·CH2Cl2 and 39.8 < 2** < 40.0˚ for **4**. Intensity data were corrected for Lorentz and polarization effects and for absorption (empirical, ** scans). In each case, no significant decay was observed for three standard reflections monitored every 150 reflections during the data collection.

The structure solution and refinements were carried out by using the teXsan crystallographic software package.1 The positions of the non-hydrogen atoms were determined by Patterson methods (DIRDIF PATTY2) and subsequent Fourier syntheses. All non-hydrogen atoms were refined by full-matrix least-squares techniques (based on *F*) with anisotropic thermal parameters. One of the chlorine atoms of the CH2Cl2 in **3a**·CH2Cl2 was found at two disordered positions and refined with the occupancies of 0.75 and 0.25. The OH hydrogen atoms were found in the Fourier-difference maps, and all other hydrogen atoms except for those of the CH2Cl2 in **3a**·CH2Cl2 were placed at the calculated positions (dC–H = 0.95 Å). These hydrogen atoms were included with fixed isotropic parameters in the final stages of refinements. The unit cell of **4** contains two crystallographically independent molecules, whose structures are essentially the same (Figure 1). Further details of crystallographic and structural data are given in CIF format.

**References**

1 *teXsan: Crystal Structure Analysis Package*; Molecular Structure Corp.: The Woodlands, TX, 1985 and 1992.

2 PATTY: Beurskens, P. T.; Admiraal, G.; Beurskens, G.; Bosman, W. P.; Garcia-Granda, S.; Gould, R. O.; Smits, J. M. M.; Smykalla, C. *The DIRDIF program system*; Technical Report of the Crystallography Laboratory, University of Nijmegen: Nijmegen, The Netherlands, 1992.

**Figure 1.** Structure of one of the independent molecules in **4**. Ir(1)–C(1) = 2.388(7), Ir(1)–C(2) = 2.347(7), Ir(1)–C(3) = 2.270(8), Ir(1)–C(4) = 2.210(8), Ir(1)–C(5) = 2.294(8), Ir(1)–C(6) = 2.364(7), Rh(1)–O(1) = 2.064(5), Rh(1)–O(2) = 2.106(5), C(1)–O(1) = 1.286(8), C(8)–O(2) = 1.347(8), O(2)···O(3) = 2.512(6), O(3)···O(4) = 2.597(7), Rh(1)···H(6) = 2.55 Å.
